# Supplementary material for: Reporting Clinical End Points and Safety Events in an Acute Coronary Syndrome Trial: Results With Integrated Collection
Source: PubMed Central journal article supplement — J Am Heart Assoc. 2017 Apr 24;6(4):e005490. doi: 10.1161/JAHA.117.005490 (PMC5533035; doi:10.1161/jaha.117.005490), 2017-04-24
Supplement: JAH3-6-e005490-s001.pdf [file JAH3-6-e005490-s001.pdf]

# **Supplemental Material**

**Table S1. APPRAISE-2 clinical endpoint definitions**

| Clinical Endpoints       | Definition                                                                                                                                                                                                                                                                                                                                                                                                                                                                                                                                                                 |
|--------------------------|----------------------------------------------------------------------------------------------------------------------------------------------------------------------------------------------------------------------------------------------------------------------------------------------------------------------------------------------------------------------------------------------------------------------------------------------------------------------------------------------------------------------------------------------------------------------------|
| Myocardial infarction    | Elevation of cardiac biomarkers (CK-MB, troponin T or troponin I) above the upper reference limit + one of the following:<br>a. ischemic symptoms<br>b. ECG changes: $\geq 1$ mm ST elevation in 2 leads, or $\geq 0.5$ mm ST depression in 2 leads dynamic horizontal or downsloping, or new and dynamic T wave inversion $> 0.1$ mm in 2 leads<br>c. Imaging evidence of new loss of viable myocardium or new regional wall motion abnormality on echocardiography, radionuclide ventriculography, or MRI                                                                |
| Unstable angina          | Worsening or recurrent severe or repetitive angina symptoms at rest lasting at least 10 minutes + at least 2 of the following:<br>a. ECG changes: $\geq 1$ mm ST elevation in 2 leads, or $\geq 0.5$ mm ST depression in 2 leads dynamic horizontal or downsloping, or new and dynamic T wave inversion $> 0.1$ mm in 2 leads<br>b. leading to inpatient hospitalization<br>c. leading to an unplanned or urgent cardiac catheterization that shows evidence of hemodynamically and clinically significant stenosis, with or without revascularization                     |
| Stroke                   | A sudden onset of focal neurological deficit that lasted at least 24 hours, not related to another identifiable cause (i.e. brain tumor).                                                                                                                                                                                                                                                                                                                                                                                                                                  |
| Bleeding (TIMI criteria) | Major: Fatal bleeding, intracranial hemorrhage, and clinically overt bleeding with a hemoglobin drop of $\geq 5$ g/dl, or $\geq 15\%$ absolute decrease in hematocrit.<br>Minor: Observed blood loss with 3 g/dl decrease in hemoglobin concentration or 10% decrease in hematocrit; or no observed blood loss with 4 g/dl decrease in hemoglobin concentration or 12% decrease in hematocrit<br>Minimal: any clinically overt or observed sign of hemorrhage that is associated with a $< 3$ g/dl decrease in hemoglobin concentration or $< 9\%$ decrease in hematocrit. |

**Table S2. Rates of serious and non-serious clinical events**

| Category of event                                    | Serious    | Non-serious |
|------------------------------------------------------|------------|-------------|
| <b>Prespecified AEs</b>                              |            |             |
| Heart failure                                        | 308 (71.8) | 121 (28.2)  |
| Pneumonia                                            | 87 (52.4)  | 79 (47.6)   |
| Syncope                                              | 25 (48.1)  | 27 (51.9)   |
| Atrial fibrillation                                  | 61 (30.5)  | 139 (69.5)  |
| Chest pain                                           | 195 (22.3) | 681 (77.7)  |
| Urinary tract infection                              | 27 (16.0)  | 142 (84.0)  |
| Hypertension                                         | 45 (14.4)  | 268 (85.6)  |
| Dizziness                                            | 18 (6.6)   | 254 (93.4)  |
| Dyspnea                                              | 10 (3.6)   | 268 (96.4)  |
| Headache                                             | 2 (0.9)    | 229 (99.1)  |
| Bleed sent for coordinator review only               | 117 (9.1)  | 1173 (90.9) |
| <b>Site-Reported Endpoints</b>                       |            |             |
| Myocardial infarction                                | 391 (97.5) | 10 (2.5)    |
| Unstable angina                                      | 372 (82.9) | 77 (17.1)   |
| Ischemic stroke                                      | 71 (93.4)  | 5 (6.6)     |
| Intracranial hemorrhage                              | 17 (100.0) | 0 (0.0)     |
| Stroke (unknown type)                                | 5 (83.3)   | 1 (16.7)    |
| TIA                                                  | 13 (68.4)  | 6 (31.6)    |
| TIMI major bleeding                                  | 43 (81.1)  | 10 (18.9)   |
| TIMI major or minor bleeding                         | 53 (70.7)  | 22 (29.3)   |
| ISTH major or clinically relevant non-major bleeding | 151 (43.4) | 197 (56.6)  |

Abbreviations: AEs, adverse events; ISTH, International Society on Thrombosis and Haemostasis; TIA, transient ischemic attack; TIMI, Thrombolysis in Myocardial Infarction.

**Table S3. Associations between region and patient characteristics and event reporting**

|                                    | Clinical endpoints |       |        | Serious AEs       |        |        | Non-serious AEs   |       |        |
|------------------------------------|--------------------|-------|--------|-------------------|--------|--------|-------------------|-------|--------|
|                                    | RR (95% CI)        | F     | p      | RR (95% CI)       | F      | p      | RR (95% CI)       | F     | p      |
| <b>Region (ref: East Europe)</b>   |                    | 5.82  | 0.0001 |                   | 10.33  | <.0001 |                   | 3.03  | 0.0167 |
| <b>Asia Pacific</b>                | 0.62 (0.42, 0.92)  |       |        | 0.97 (0.64, 1.47) |        |        | 1.36 (0.89, 2.08) |       |        |
| <b>North America</b>               | 1.26 (0.93, 1.71)  |       |        | 1.85 (1.32, 2.59) |        |        | 1.78 (1.25, 2.53) |       |        |
| <b>South America</b>               | 1.74 (1.20, 2.51)  |       |        | 1.58 (1.03, 2.43) |        |        | 1.18 (0.76, 1.83) |       |        |
| <b>West Europe</b>                 | 1.39 (1.03, 1.88)  |       |        | 2.65 (1.91, 3.68) |        |        | 1.53 (1.08, 2.17) |       |        |
| <b>Age (per 10y)</b>               | 1.21 (1.10, 1.33)  | 16.15 | <.0001 | 1.07 (1.00, 1.15) | 3.75   | 0.0528 | 1.03 (1.00, 1.07) | 4.62  | 0.0317 |
| <b>Female sex</b>                  | 1.17 (0.99, 1.39)  | 3.52  | 0.0608 | 1.13 (0.99, 1.28) | 3.43   | 0.0640 | 1.26 (1.19, 1.34) | 62.91 | <.0001 |
| <b>Peripheral vascular disease</b> | 1.17 (0.96, 1.44)  | 2.40  | 0.1217 | 1.45 (1.26, 1.68) | 25.43  | <.0001 | 1.09 (1.01, 1.17) | 4.98  | 0.0257 |
| <b>Depression</b>                  | 1.28 (0.92, 1.77)  | 2.19  | 0.1391 | 1.77 (1.45, 2.17) | 30.39  | <.0001 | 1.27 (1.14, 1.42) | 17.90 | <.0001 |
| <b>Hypertension</b>                | 1.25 (0.99, 1.59)  | 3.52  | 0.0605 | 1.16 (0.99, 1.37) | 3.28   | 0.0701 | 1.05 (0.98, 1.13) | 1.72  | 0.1900 |
| <b>Cardiovascular disease</b>      | 1.08 (0.84, 1.39)  | 0.35  | 0.5535 | 0.92 (0.76, 1.12) | 0.66   | 0.4177 | 1.02 (0.93, 1.11) | 0.13  | 0.7139 |
| <b>Atrial fibrillation</b>         | 1.30 (0.98, 1.72)  | 3.28  | 0.0703 | 1.25 (1.01, 1.55) | 4.22   | 0.0400 | 1.21 (1.10, 1.34) | 13.78 | 0.0002 |
| <b>Diabetes</b>                    | 1.30 (1.10, 1.53)  | 9.33  | 0.0023 | 1.35 (1.19, 1.53) | 21.28  | <.0001 | 1.07 (1.01, 1.13) | 4.68  | 0.0306 |
| <b>Heart failure</b>               | 1.19 (1.01, 1.40)  | 4.22  | 0.0401 | 1.93 (1.70, 2.18) | 106.50 | <.0001 | 1.10 (1.03, 1.16) | 9.26  | 0.0024 |
| <b>Renal dysfunction</b>           | 1.13 (0.94, 1.37)  | 1.63  | 0.2020 | 1.30 (1.12, 1.50) | 12.12  | 0.0005 | 1.11 (1.04, 1.19) | 9.83  | 0.0017 |

Abbreviations: AEs, adverse events; CI, confidence interval; RR, relative risk.

**Figure S1. Rates of site-reported clinical endpoints, serious adverse events, and non-serious adverse events per 100 patient-days of follow-up at site level (sites with 10 or more patients, n=241)**

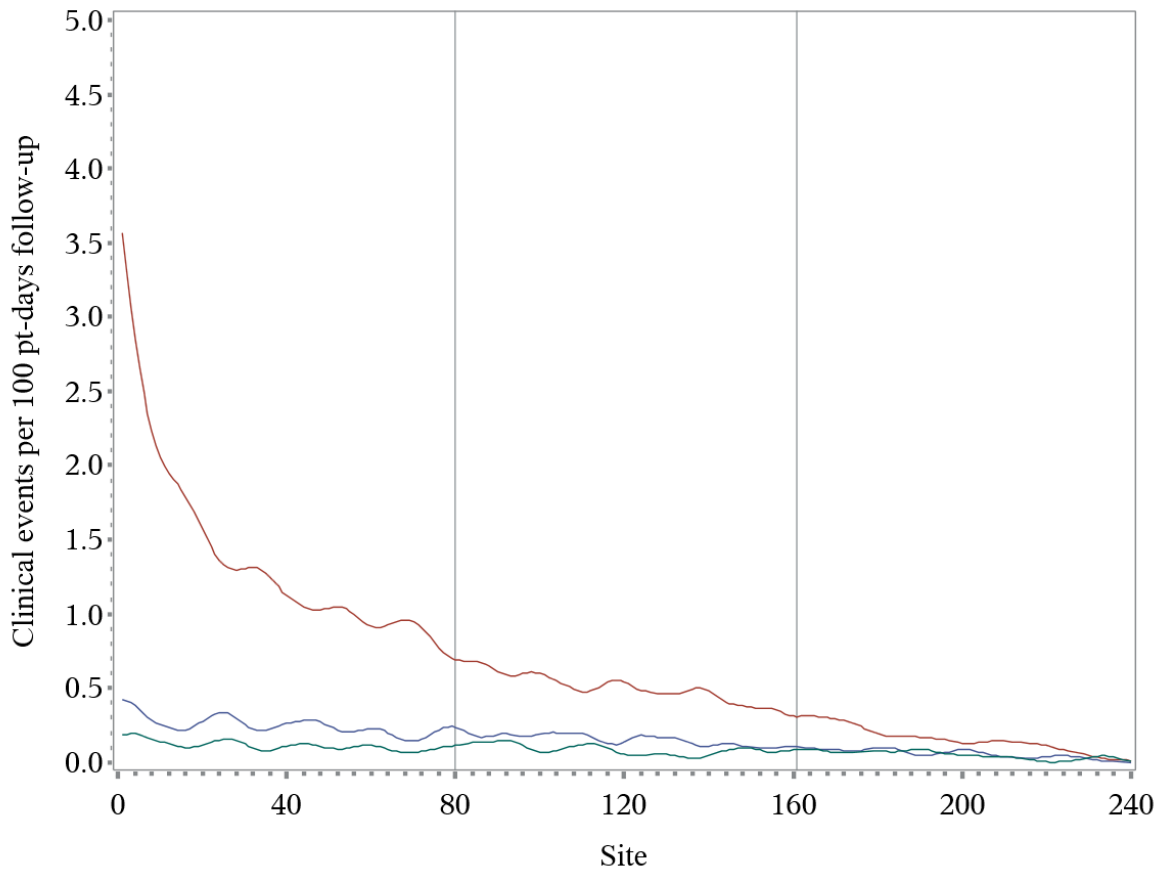

The median (IQR) rate of clinical events per 100 patient-days of follow-up for high-reporting, middle-reporting and low-reporting sites were: 0.20 (0.10,0.35), 0.13 (0.06,0.23), 0.04 (0.00,0.07) for serious adverse events; 1.15 (0.94,1.56), 0.52 (0.38,0.62), 0.14 (0.06,0.23) for non-serious adverse events; and 0.09 (0.04,0.17), 0.06 (0.03,0.12), 0.04 (0.00,0.08) for site-reported endpoints.
